# Supplementary material for: Current Classification and Diversity of Fusarium Species Complex, the Causal Pathogen of Fusarium Wilt Disease of Banana in Malaysia
Source: MDPI journal article supplement (doi:10.3390/agronomy11101955), 2021-09-28
Supplement: s1 [file s1]

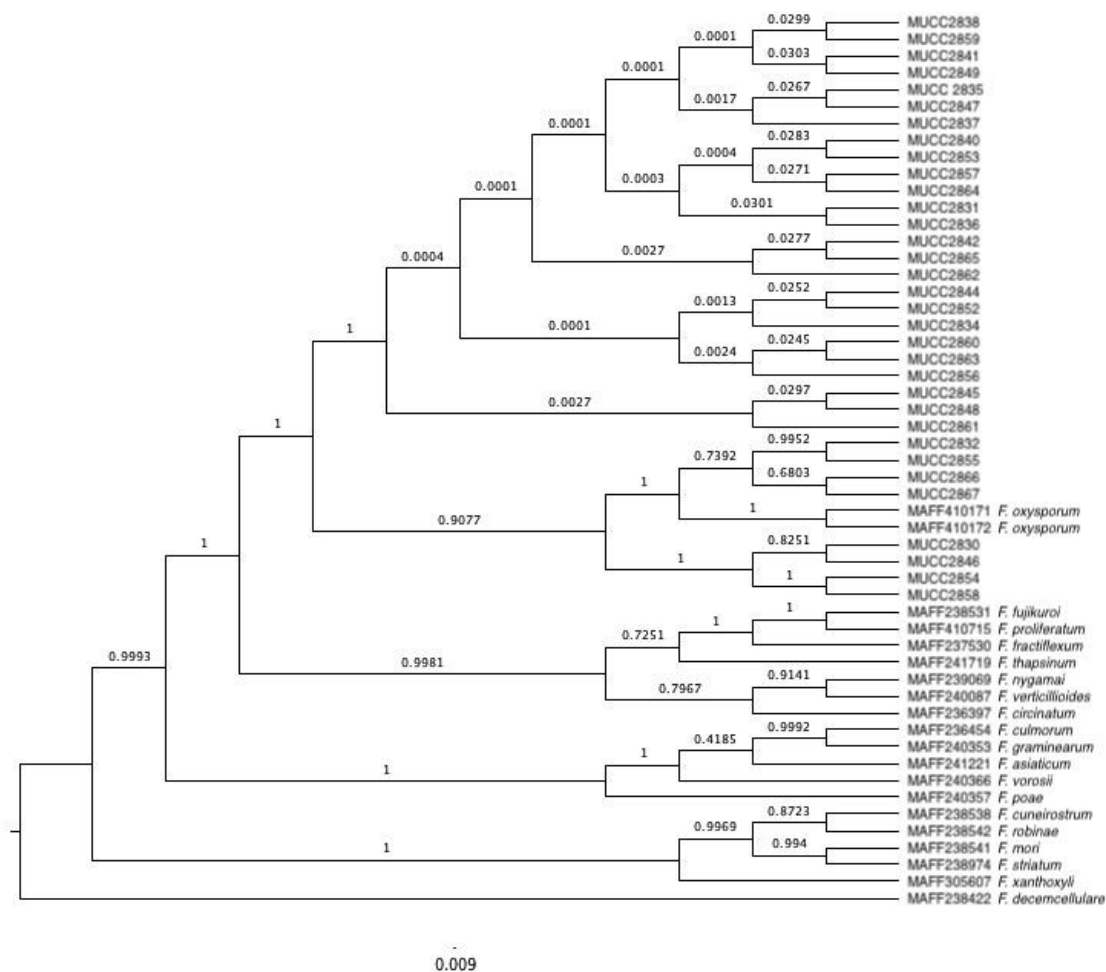

**Figure S1.** His H3 Bayesian tree with posterior probability (PP) with 1,000,000 generation. MCMC chain were sampled at every 1,000 generation. Branch length unit is substitution per site.

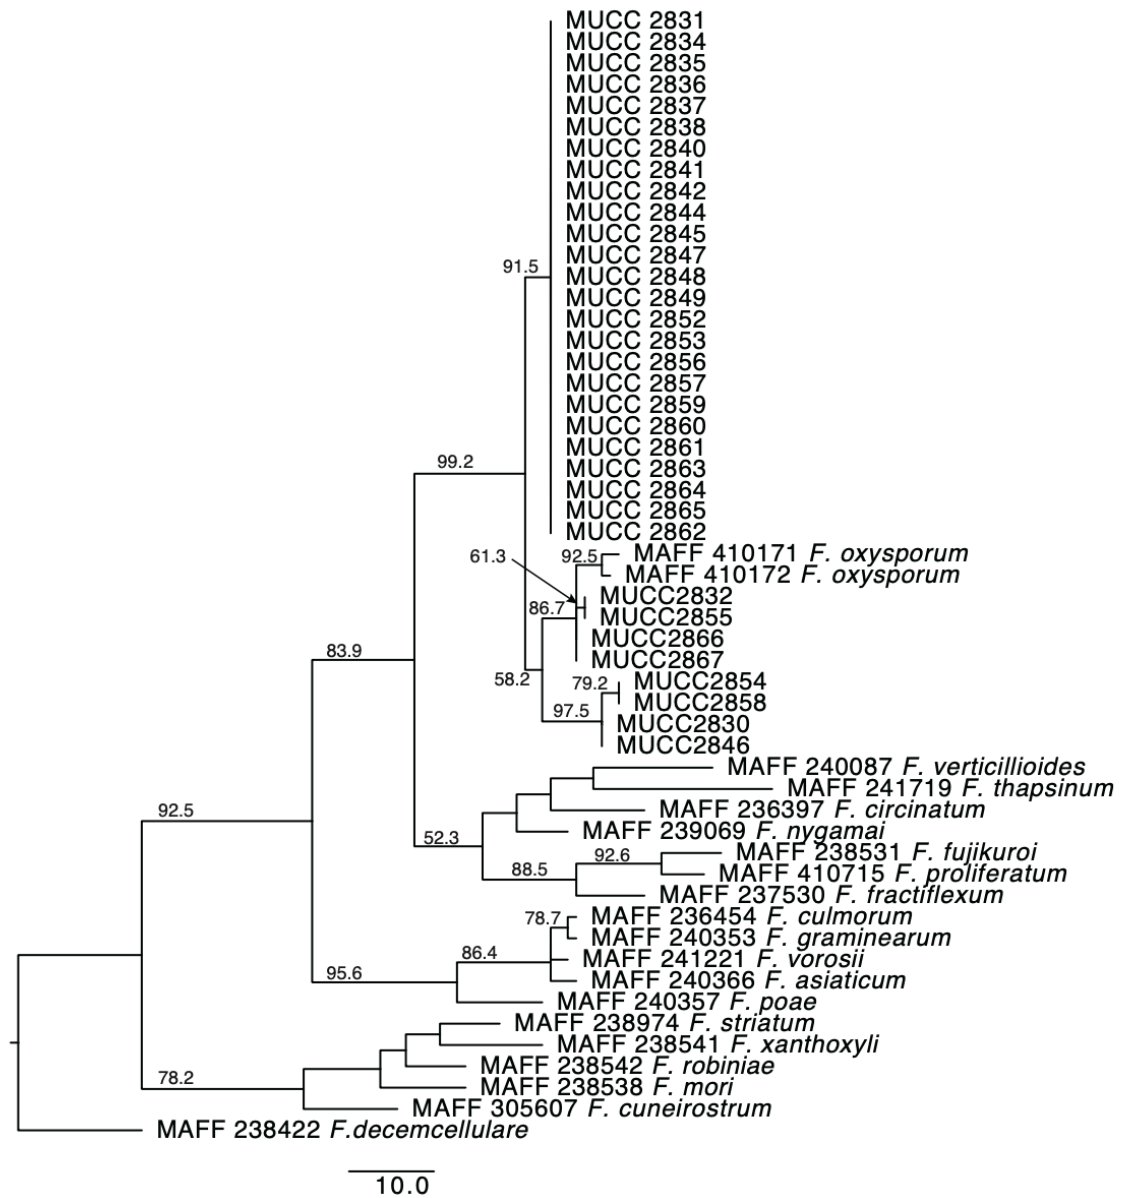

**Figure S2.** His H3 Maximum parsimony (MP) tree with bootstrap value. Tree length (TL) = 343, Consistency Index (CI) = 0.633, Retention Index (RI) = 0.833, Rescaled Consistency (RC) = 0.527.

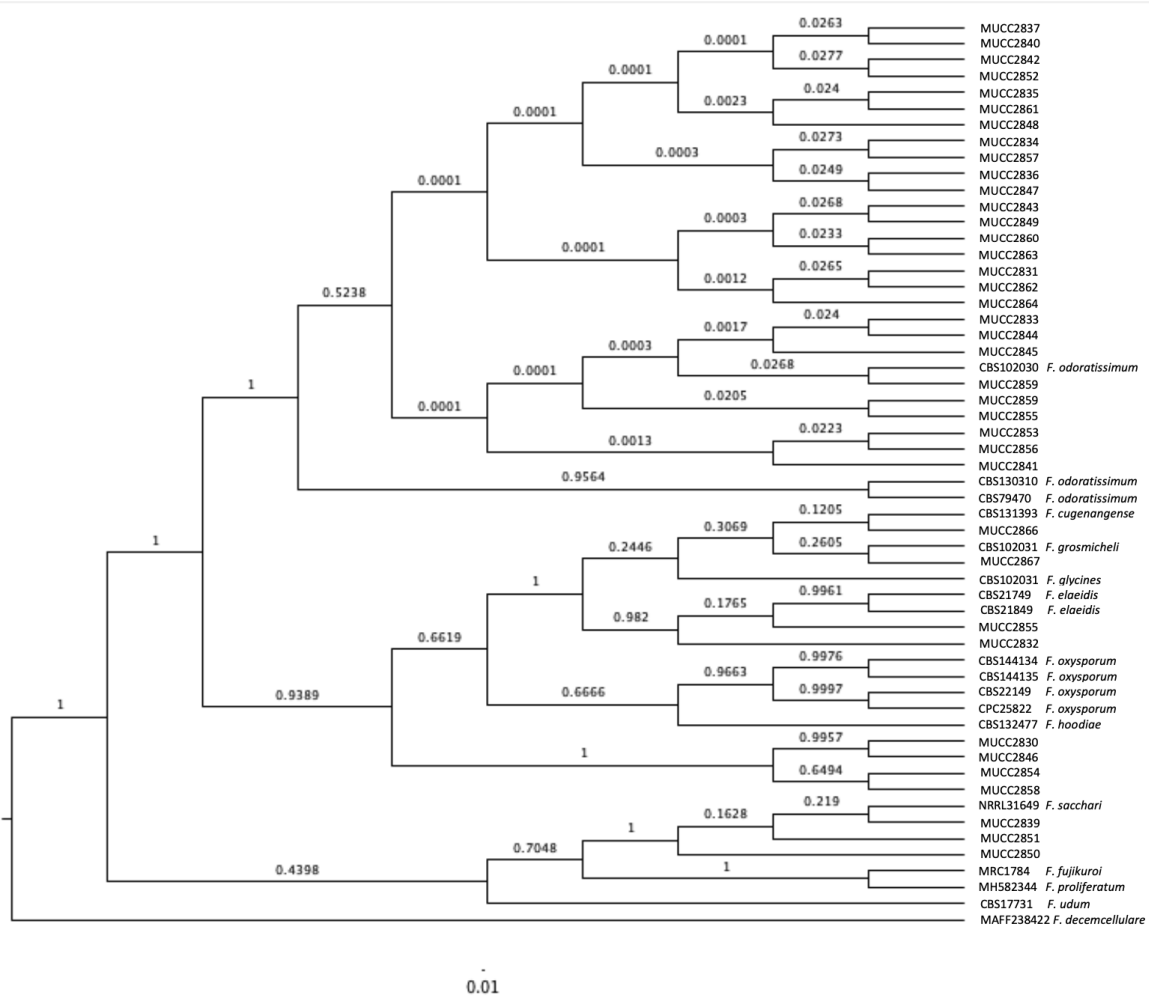

**Figure S3.** TEF-1 $\alpha$  H3 Bayesian tree with posterior probability (PP) with 1,000,000 generation. MCMC chain were sampled at every 1,000 generation. Branch length unit is substitution per site.

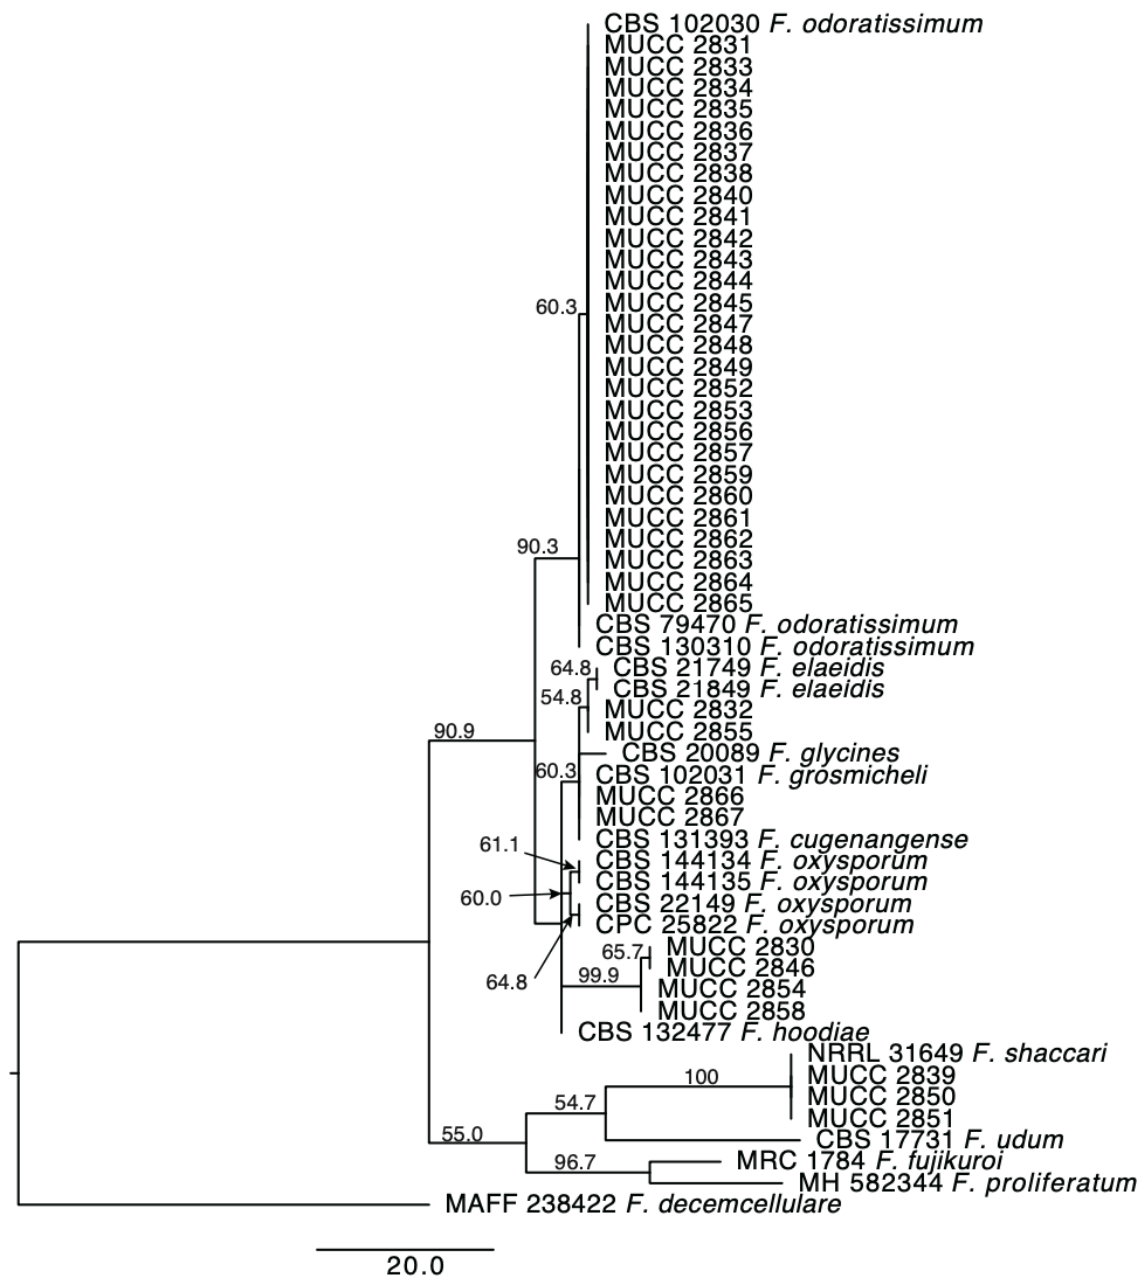

**Figure S4.** TEF-1 $\alpha$  Maximum parsimony (MP) tree with bootstrap value. Tree length (TL) = 235, Consistency Index (CI) = 0.868, Retention Index (RI) = 0.929, Rescaled Consistency (RC) = 0.806.

**Table S1.** GenBank accessions numbers of *Fusarium* reference strains for phylogenetic analyses.

| <b>Fungus species</b>     | <b>Isolates</b> | <b>TEF-1<math>\alpha</math></b> | <b>H3</b>     |
|---------------------------|-----------------|---------------------------------|---------------|
| <i>F. asiaticum</i>       | MAFF 240366     | Not available                   | MAFF*         |
| <i>F. circinatum</i>      | MAFF 236397     | Not available                   | MAFF          |
| <i>F. cugenangense</i>    | CBS 131393      | MH485019                        | Not available |
| <i>F. culmorum</i>        | MAFF 236454     | Not available                   | MAFF          |
| <i>F. cuneirostrum</i>    | MAFF 305607     | Not available                   | MAFF          |
| <i>F. decemcellulare</i>  | MAFF 238422     | AB674295                        | MAFF          |
| <i>F. elaeidis</i>        | CBS 217.49      | MH484961                        | Not available |
| <i>F. elaeidis</i>        | CBS 218.49      | MH484962                        | Not available |
| <i>F. fujikuroi</i>       | MAFF 238531     | Not available                   | MAFF          |
| <i>F. fujikuroi</i>       | MRC 1784        | MH582338                        | Not available |
| <i>F. germinaerum</i>     | MAFF 240353     | Not available                   | MAFF          |
| <i>F. glycines</i>        | CBS 200.89      | MH484979                        | Not available |
| <i>F. grosnicheli</i>     | CBS 102031      | LS479744                        | Not available |
| <i>F. hoodiae</i>         | CBS 132477      | MH485022                        | Not available |
| <i>F. mori</i>            | MAFF 238538     | Not available                   | MAFF          |
| <i>F. nygamai</i>         | MAFF 239069     | Not available                   | MAFF          |
| <i>F. odoratissimum</i>   | CBS 102030      | MH484989                        | Not available |
| <i>F. odoratissimum</i>   | CBS 794.70      | MH484969                        | Not available |
| <i>F. odoratissimum</i>   | CBS 130310      | MH485013                        | Not available |
| <i>F. oxysporum</i>       | MAFF 410171     | Not available                   | MAFF          |
| <i>F. oxysporum</i>       | MAFF 410172     | Not available                   | MAFF          |
| <i>F. oxysporum</i>       | CBS 221.49      | MH484963                        | Not available |
| <i>F. oxysporum</i>       | CPC 25822       | MH485034                        | Not available |
| <i>F. oxysporum</i>       | CBS 144134      | MH485044                        | Not available |
| <i>F. oxysporum</i>       | CBS 144135      | MH485045                        | Not available |
| <i>F. poae</i>            | MAFF 240357     | Not available                   | MAFF          |
| <i>F. proliferatum</i>    | MAFF 410715     | Not available                   | MAFF          |
| <i>F. proliferatum</i>    | Not available   | MH582344                        | Not available |
| <i>F. robiniae</i>        | MAFF 238542     | Not available                   | MAFF          |
| <i>F. sacchari</i>        | NRRL 31649      | FD_01770_EF-1a                  | Not available |
| <i>F. striatum</i>        | MAFF 238974     | Not available                   | MAFF          |
| <i>F. udum</i>            | CBS 177.31      | MH484957                        | Not available |
| <i>F. verticillioides</i> | MAFF 240087     | Not available                   | MAFF          |
| <i>F. vorosii</i>         | MAFF 241211     | Not available                   | MAFF          |
| <i>F. xanthoxyli</i>      | MAFF 238541     | Not available                   | MAFF          |

\*MAFF: Sequences have been published at the Approved Strains Database of *Fusarium* Species, Genebank, the Genetic Resources Center, National Agriculture and Food Research Organization, Japan ([https://www.gene.affrc.go.jp/databases-micro\\_approved\\_fs\\_en.php](https://www.gene.affrc.go.jp/databases-micro_approved_fs_en.php)).
